# Supplementary material for: Multi-coverage Optimal Location Model for Emergency Medical Services (EMS) facilities under various disaster scenarios: A case study of urban fluvial floods in the Minhang District of Shanghai, China
Source: Copernicus journal article supplement (doi:10.5194/nhess-2019-214), 2019-07-18
Supplement: Supplementary file [file nhess-2019-214-AC1-supplement.pdf]

1 We sincerely thank Reviewer #1 for his support for publication

## 3 **A. Questions related to the contain of the paper**

### 5 **1. A flood simulation approach (1D and 2D models). The software used is not indicated?**

6 Thanks for noting this. It's a very important question, the flood inundation model we used is called  
7 FloodMap, this model is an established diffusion-based flood inundation model (FloodMap, Yu  
8 2005; Yu and Lane 2006a, b, 2011)

9 We will add the introduction about this model in more detail as below:

10 .  
11 “we used a 1D/2D coupled flood inundation model named FloodMap (Yu and Lane, 2006a; Yu and  
12 Lane, 2006b), to simulate the inundation scenarios of fluvial flooding in various return periods; this  
13 model combines the 1D solution of the Saint-Venant equations of river flow with a 2D flood  
14 inundation model based on raster data to solve the inertial form of the 2D shallow water equations.  
15 The model is tightly coupled by considering the mass and momentum exchange between the river  
16 flow and floodplain inundation and it is employed to simulate the flood process and extract flood  
17 potential maps. It has been applied in a number of different environments and now Floodmap is the  
18 mainstream numerical simulation model used for flood scenarios (Yin and Yu et al., 2013; Yin and  
19 Yu et al., 2015). We use the FloodMap model to simulate the inundation area and depth following  
20 fluvial flooding for various return periods (100-year and 1000-year) in the Huangpu River Basin in  
21 the 2010s, 2030s, and 2050s.”

### 23 **2. What is/are the innovative aspect-s of the paper?**

24 Thanks for your summary, this research mainly proposed multi-coverage location optimization  
25 model well suited to model the emergency response to flood disasters and to conduct site selection  
26 of urban emergency facilities.

27 The innovative aspects are

- 28 • Improving the emergency service capacity from the aspect of service population and the  
29 coverage level(how often the demand point needs to be covered by emergency facilities) during  
30 disasters
- 31 • The implementation of a treatment chain including the development of flood scenarios (100  
32 and 1000 years return periods).
- 33 • An interesting aspect is the “Coverage level analysis”

### 35 **3. The aspect of “Disaster risk level” analysis (2.5 section) simply depends on the proximity of 36 the flood hazard and EMS (Euclidean distance? See line 215).**

37 Thanks for noting this. In our case study, we used ArcGIS 10.2 buffer tool to determine the Disaster  
38 risk level by Euclidean distance. Because the impact of fluvial flood hazards on emergency response  
39 is directly related to inundated areas, unlike other disasters such as earthquake and mudslide,  
40 flooding does not destroy buildings on a large scale (the disaster risk will be related to whether the  
41 buildings are strong or not), so in our case study, we analyzed the disaster risk level of the demand  
42 points and potential emergency points and classify the disaster level according to the distance of the  
43 emergency services from the source of the disaster. In future research, we will try to develop a  
44 quantitative assessment of the disasters risk level on emergency response, is considered to be

45 reasonable.

46 We have added this discussion in Conclusion as below:

47 “The model also has some aspects that could to be improved in order to arrive at more robust  
48 solutions. Firstly, in our case study, we did not have a quantitative assessment of the disasters risk  
49 level on emergency response, we evaluated the disaster risk level only by the buffer distance to  
50 disaster source area, which is subjective..... The future studies will consider disaster risk factors  
51 such as the vulnerability of buildings comprehensively, evaluate the level of disaster risk  
52 quantitatively, and take the real terrain and construction cost of each potential point into full account.”

53

54

55 **4. Line 163: “To ensure the efficiency of rescue, the emergency response time must be**  
56 **minimized”**: for each ambulance (each rescue) or for all ambulances (all calls/rescues)?(need  
57 more detail )

58

59 Thanks for noting this. Yes, in line 146 we defined that parameter  $t_{ij}$  was the time needed for an  
60 ambulance to travel from emergency medical facilities  $j$  to demand point  $i$ . We use  $t_{ij}$  to constraint  
61 that the emergency response time cannot exceed  $T$  minutes in model ( $t_{ij} < T$ ), which met Chinese  
62 emergency response time limit. In time limit, how to serve the largest number people is the objective  
63 of our model.

64 The sentence has been removed to Line 173 and changed as below:

65 “Constraint (4) ensures that the emergency response time cannot exceed  $T$  minutes to ensure the  
66 efficiency of rescue;”

67

68 **5. However, calls usually come to a call center, which distributes them according to different**  
69 **aspects, such as the availability of ambulances, the remaining capacities of the nearest EMS**  
70 **of the site, and so on. But it seems that the paper is not in this configuration (sorry, I am not**  
71 **familiar with the Chinese rescue system). Please, see the comment above related to the**  
72 **assumption ②.**

73 Thanks for your comments. Yes, in normal cases, ambulances distributed according by distance or  
74 other aspects. We also analyzed almost 40000 records of EMS calls of study in 2017(Figure 1). The  
75 results show that demand points can be served by multiple EMS stations. Therefore, the assumption  
76 ② (During a disaster, Each emergency facility has the same service capacity and the same number  
77 of ambulances;) is based on one single historical data and this is considered to be reasonable  
78 especially during disasters.

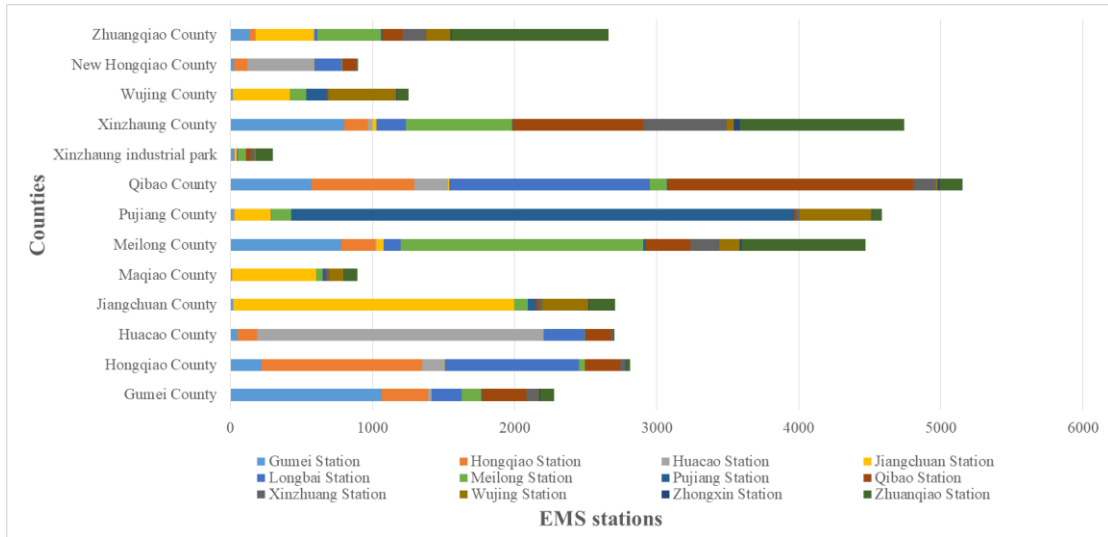

Fig.1 the EMS calls records of 13 counties (Minhang district) in 2017

79

80

81

82 **6. Line 167 :  $\sum_{i=1}^n y_j = F$  Or  $\sum_{j=1}^n y_j = F$**

83

84 Thanks for noting this. It has been corrected.

85

86 **7. Line 255: "...in the Huangpu River Basin in the 2010s, 2030s, and 2050s (Fig. 2)" Does**  
 87 **this mean that the flood simulation model takes into account aspects such as precipitation**  
 88 **trends, urban sprawl and / or population change in 2010, 2030 and 2050 (in a context of climate**  
 89 **change?). I imagine that all these aspects are considered in the cited references of Yu and Lane**  
 90 **2006a and 2006b (Line 249)**

91 Thanks for noting this. Yes, the model(Floodmap) we used is a mature flood inundation model, and  
 92 in our case study, the flooding inundation simulation results was took reference by Yin et al (2013)  
 93 research, it considered sea level rise and land subsidence on storm tides induced flooding of the  
 94 Huangpu River(Figure 2).

95

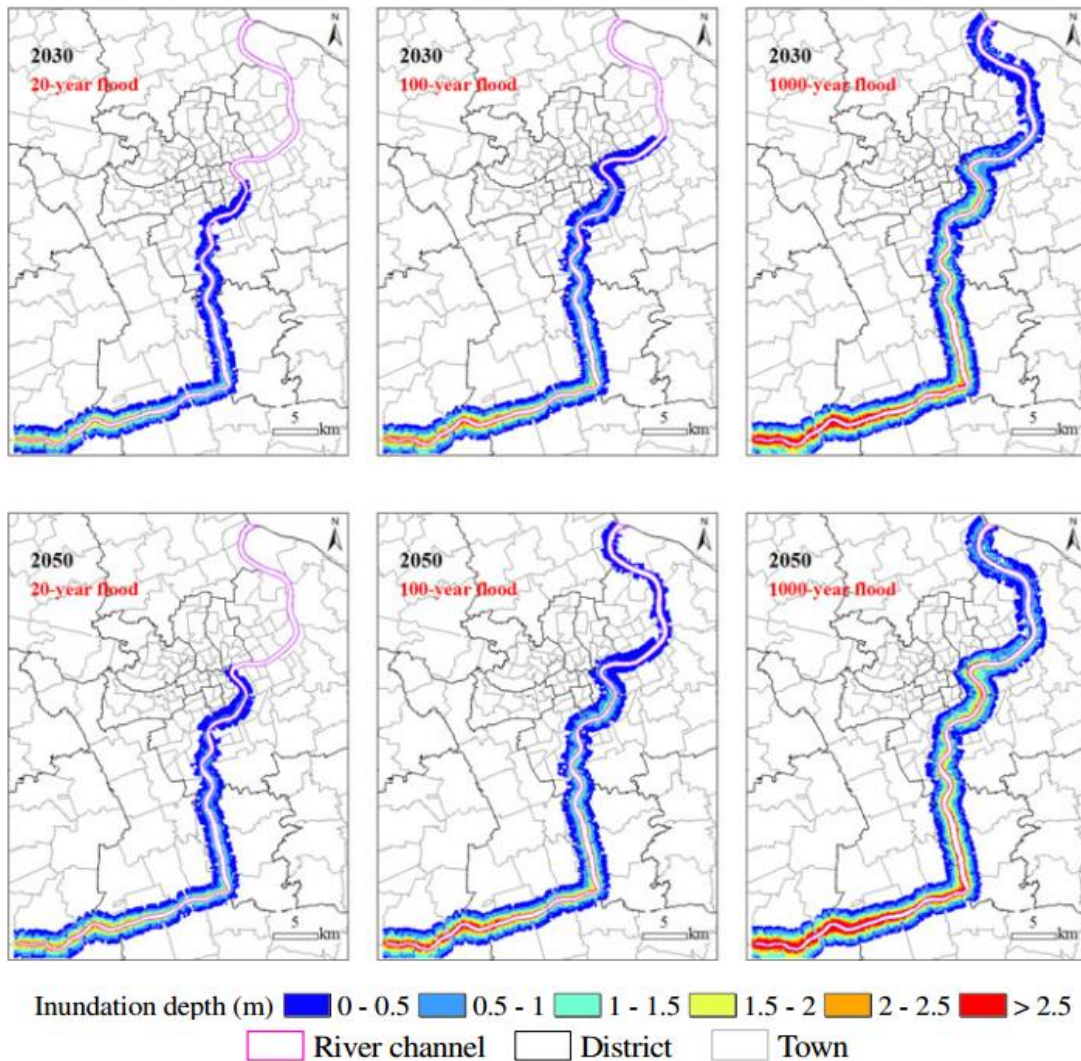

Fig.2 multiple scenario of Huangpu river flooding

96  
 97  
 98  
 99  
 100  
 101  
 102  
 103  
 104  
 105  
 106  
 107  
 108  
 109  
 110  
 111  
 112  
 113  
 114

**8. Line 263 : “We used five levels for the road speed limit”**

**Remember that ambulances and rescue services (fire brigade) in general are allowed to exceed speed limits during an intervention. For low speed road sections (30 km/h for example), we could increase this speed in the model... (under ArcGIS, it is quite possible / easy to change the speed of a category / class of road sections with VB or Python script).**

Thanks for noting this. Yes, in general, ambulance are allow to exceed speed limit. However, in fact, road conditions included height and weight always constraint road speeds, and not all roads have emergency vehicle lanes that's why ambulances are not so easy to exceed speed limits. Furthermore, there are too much uncertainties associated with how human behavior and patterns of congestion may differ under flood conditions. Therefore, the speed of the road is difficult to define accurately.

**9. On the other hand, the method/process of designing the 514 demand points is less clear (red -dots, Fig. 4 - 5, page 11). Shanghai Minhang district Community unit (demand unit = smallest block unit)?**

Thanks for noting this. Yes, in order to verify the model applicability, we set each community unit as the smallest unit, because in China, the EMS services always allocated by blocks or communities,

115 while the same communities have same attributes, so there is reason to take community unit as the  
 116 smallest unit. Another reason is we have Shanghai Communities' population and other detailed data,  
 117 what make study more precisely. Because of the communities are small, it is scientific to take the  
 118 central point as the rescue unit. Of course, it would be better if we had the building data, but the  
 119 efficiency of model running would also increase significantly.

120

121 **10. About the applied grid of 2 km \* 2 km: can be discussed in the section of results / discussion/  
 122 conclusion of the article. Indeed, what is the impact of such division/regular zoning on the  
 123 method and results obtained? Can we develop / imagine a multi-scale division with variable  
 124 squared meshes taking into account the distribution density of the population (spatial  
 125 distribution of red dots)?**

126

127 Thanks for your suggestions. We have added the discussion about the impact of such division/regular  
 128 zoning on the method in conclusion:

129 “Lastly, the location of urban emergency service facilities has always been the focus of urban  
 130 planning. Location selection should consider a variety of factors and the ability to respond to  
 131 disasters is also a key factor to consider, while in this paper, we divided the area into grids with a  
 132 cell size of 2 km \* 2 km and assumed that every grid center point was a potential emergency station,  
 133 The division of grid will affect the efficiency of model running efficiency and the accuracy of results.  
 134 The smaller the scale, the higher the accuracy, but the greater the model running pressure. Therefore,  
 135 in the future research, we will consider multi-scale division with variable squared meshes taking  
 136 into account the distribution density of the population or other factors.”

137

138

139 **11. Line 327: Tab 1. No need to display/show the coordinates of points 1, 2, 3, etc. (latitude and  
 140 longitude values). However, it misses the values of: min (A1), min (A2), max (A1) and max (A2)  
 141 (equation 8) to allow the reader (who wishes to do it) to calculate/verify Qi?**

142

143 Thanks for your comments, we have altered the table in revised paper (shown in Table 1)

144

**Tab.1 Demand point coverage level (sub-sample of the demand point data)**

| Point ID | Area(km <sup>2</sup> ) | Population | EMS calls | Population density(A1) | EMS calls density(A2) | Coverage level |
|----------|------------------------|------------|-----------|------------------------|-----------------------|----------------|
| 1        | 0.1624119              | 5225       | 74        | 32,171.28              | 455.6315              | 4              |
| 2        | 0.06345485             | 3217       | 44        | 50,697.46              | 693.4064              | 6              |
| 3        | 0.09560105             | 3137       | 59        | 32,813.45              | 617.148               | 4              |
| 4        | 0.2068276              | 5955       | 89        | 28,792.10              | 430.3101              | 4              |
| 5        | 0.2035748              | 6451       | 150       | 31,688.60              | 736.8299              | 5              |
| 6        | 0.1510978              | 4728       | 173       | 31,290.99              | 1,144.95              | 6              |
| 7        | 1.463531               | 11332      | 273       | 7,742.92               | 186.5352              | 2              |
| 8        | 0.6317168              | 3317       | 76        | 5,250.77               | 120.3071              | 1              |
| 9        | 3.198358               | 8736       | 27        | 2,731.40               | 8.441831              | 1              |

|     |               |       |     |           |             |     |
|-----|---------------|-------|-----|-----------|-------------|-----|
| 10  | 0.1303969     | 3970  | 61  | 30,445.52 | 467.8027    | 4   |
| 11  | 0.1299455     | 5082  | 57  | 39,108.70 | 438.6454    | 4   |
| 12  | 0.3076447     | 4113  | 123 | 13,369.32 | 399.8118    | 2   |
| 13  | 0.254323      | 3115  | 71  | 12,248.21 | 279.1726    | 2   |
| 14  | 0.08798262    | 4396  | 51  | 49,964.41 | 579.6599    | 5   |
| 15  | 0.1688578     | 4294  | 37  | 25,429.68 | 219.1193    | 3   |
| 16  | 0.1297367     | 3815  | 69  | 29,405.72 | 531.8465    | 4   |
| 17  | 2.101426      | 2801  | 113 | 1,332.90  | 53.773      | 1   |
| 18  | 3.886865      | 6481  | 90  | 1,667.41  | 23.15491    | 1   |
| 19  | 0.2178247     | 4066  | 58  | 18,666.38 | 266.2691    | 2   |
| 20  | 0.3022524     | 5911  | 114 | 19,556.50 | 377.1681686 | 3   |
| ... | ...           | ...   | ... | ...       | ...         | ... |
| Max | 10978496.3425 | 25419 | 608 | 76608.25  | 1870.493324 | 8   |
| Min | 20271.96894   | 86    | 0   | 25.7722   | 0           | 1   |

145

146

147 **12. So, do you know the number of real trips (statistical data of 2017)1 done by ambulances**  
 148 **between EMS and Point ID 1 (or at least the ratio between calls and trips)? If possible to**  
 149 **compare the distribution of Qi (calculated values) with the values observed on the site in the**  
 150 **recent past (a way to appreciate/validate the values obtained/calculated of Qi).**

151

152 Thanks for your comments. Sorry, we don't have the real trip of ambulances, but we analyzed the  
 153 EMS calls records of 13 counties (Minhang district) in 2017(Figure 1), the vertical axis is the source  
 154 county of the demand points and horizontal axis is the number of EMS calls. The results showed  
 155 that each demand point can be served by multiple EMS stations, however, in normal cases the  
 156 ambulance are always allocated by distance especially in a short time. For example, the demand  
 157 points of some counties, such as Xinzhuang county, can be served by multiple EMS service stations  
 158 (with high coverage level Qi), while some counties such as Jiangchuan county can only be served  
 159 by Jiangchuan EMS station in most cases (with low coverage level Qi), which means that if the  
 160 station is destroyed disasters (eg.1000-y fluvial flooding in 2050s), the emergency response time of  
 161 Jiangchuan county will be greatly delayed.

162 We also compared how many times every demand point would be covered in 8, 12, and 15 minutes  
 163 during the no-flooding and the worst-case flooding scenarios (Figure 3). The percent coverage is  
 164 expressed as percentage of demand points for different coverage levels. The results were interesting,  
 165 for example, in 8-min response time or 12-min response time, the model greatly improved the  
 166 coverage level of interval 5~8, what's more, we also found that the optimized coverage level almost  
 167 same during the no-flooding or the worst-case flooding scenarios, what means extreme fluvial  
 168 flooding have little impact on EMS emergency response.

169 [We will supplement the results in revised paper](#)

170

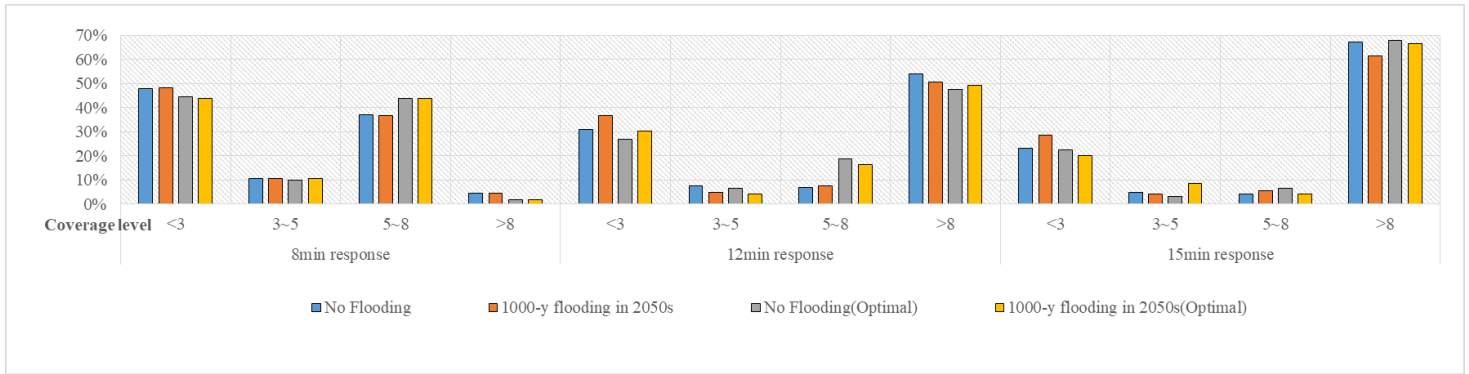

Fig 3 Comparisons of the coverage level

171

172

173 **13. Line 340, Section 3.3.2: which flood scenario is considered in Fig. 5?**

174 **The 3 buffers of 1 km each used to characterize the indicator "Disaster Risk Level" are more**  
 175 **relevant (pertinent) especially if it is the flood scenario of 100-y (rather than 1000-y). In this**  
 176 **case, the spatial discretization (by the 3 buffers) will be interesting to take into account the**  
 177 **variability (uncertainty) of the flood extension between the simulated scenario and the**  
 178 **observed one (flooding closer to 150 or 200-y ... than 100-y).**

179 **A flood of 1000-y, may already be considered as an extreme event (I am not familiar with the**  
 180 **site studied). To have water beyond the flooded area of 30 cm (Fig.5), it would take a more**  
 181 **extreme flood event (1500-y ...). Is this possible in the context of the study site (climate change)?**

182 **In the past, has there been a higher (historical) flood than the 1000-y scenario?**

183 **Here is a proposal for the flood of 1000-y:**

184 **•  $p_j = 0$  if water height is  $> 30$  cm (EMS is completely inundated)**

185 **•  $p_j = 1$  if water height is  $\leq 30$  cm**

186 **•  $p_j = 2$  if water height is  $= 0$  cm (EMS is not inundated)?**

187 **The method shown in Fig.5 seems more suitable (pertinent) for the 100-y flooding scenario.**

188

189 Thanks for noting this. They are very important comments.

190 (1)We used the 1000-y fluvial floods of Huangpu River as the extreme flood scenario because in  
 191 Huangpu River, to protect against flooding, flood walls have been built since the 1950s. This has  
 192 since been reinforced and upgraded, resulting in most of the study area along the Huangpu River  
 193 being protected by 511 km flood walls, mostly in urban area(including our study area), can defend  
 194 a 1000-y flood (based on the frequency analysis undertaken in 1984)( Yin et al., 2013). Therefore,  
 195 100-y flooding can be well defended by flood wall and **1000-y flooding could be more**  
 196 **representative.**

197

198 (2)We tried to redefine the  $P_j$  parameter as you suggested, however, the simulation area of 'water  
 199 depth  $\leq 30$  cm'(Figure 4) in the extreme scenario(1000-y flooding in the 2050s) was **too small**,  
 200 few potential stations are in this area, which is not conducive to further analysis.

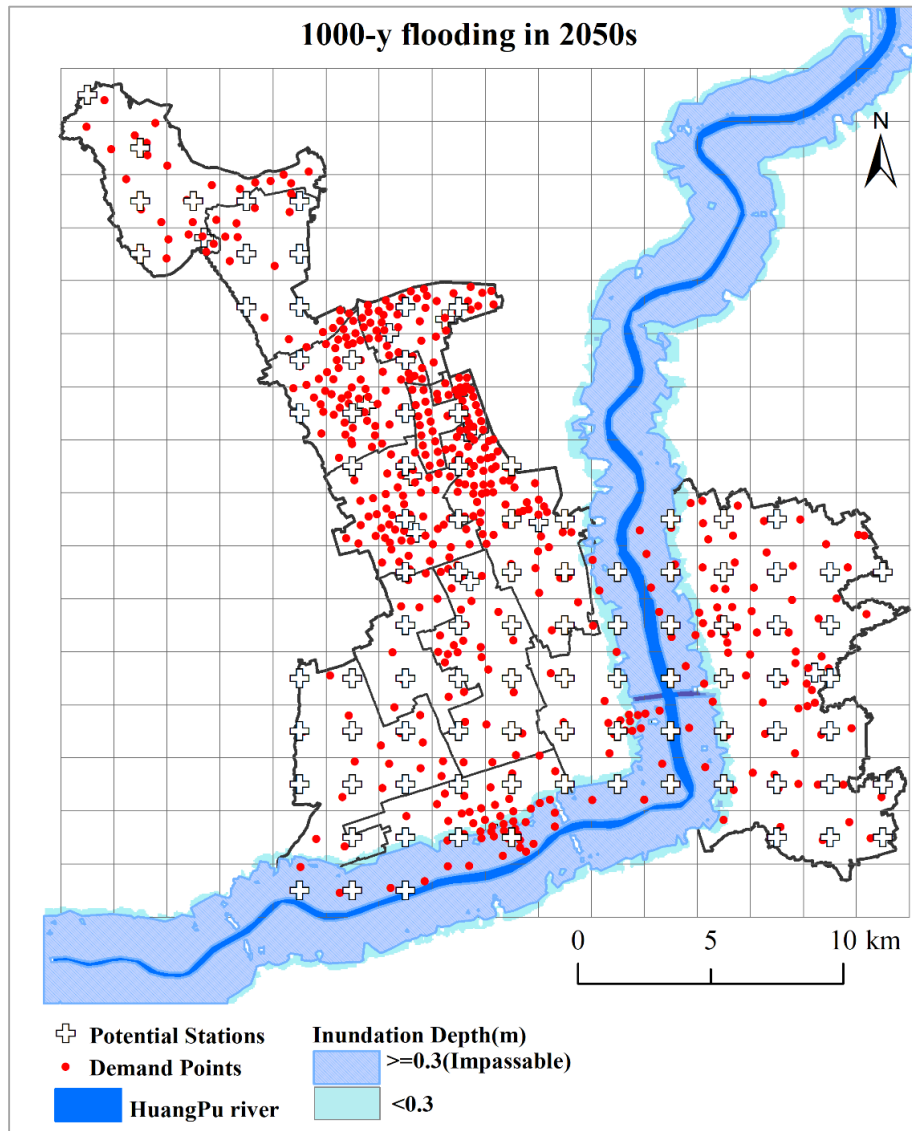

Fig.4 Inundation scenario of 1000-y flooding in the 2050s

201  
202  
203  
204  
205  
206  
207  
208  
209  
210  
211  
212  
213  
214  
215  
216  
217

**14. Line 355: The calculation of the OD matrix with the ArcGIS Network Analyst extension does not take into account the traffic jam? (see Line 192)**

Thanks for noting this. Although congestion data could be implemented into the modelling framework based on historic traffic data, we didn't use the congestion data due to uncertainties associated with how human behavior and patterns of congestion may differ under flood conditions when compared to normal conditions on which the traffic data were based. Furthermore, emergency vehicle lanes can also supply emergency vehicles in some roads so that unless road facilities are damaged in the case of disasters, emergency vehicles can drive at the maximum speed permitted by the road conditions.

To simulate the traffic jam during disaster, we considered that use the Risk Level to express the traffic jam during the crisis, we assumed that high risk level could bring heavy traffic jam, it could on behalf of the difficulties of the rescue.

So in this paper we used different road speed limit based on the People's Republic of China Technical Standard of Highway Engineering (JTG B01-2003) as the max speed to calculate the OD matrix.



218 **15. Line 374: "...i.e., the larger the service area, the larger the number of people who can be**  
 219 **served by this station": this statement (affirmation) is not always true.**

220

221 Thanks for your comments. Yes, we know that the service area cannot replace the number of people  
 222 who can be served by this station, we will modify the expression. But it is undeniable that the service  
 223 area is also an important indicator of service capacity evaluation of an emergency rescue station.  
 224 Many researches use service area to evaluate emergency responder accessibility. So in this paper we  
 225 both used the service area and the served population as the judgment criteria to compare the service  
 226 capacity of stations. In fact, in our study we have compared the difference of service area and the  
 227 service population (Table2), we can see that in most case in our study area, larger service can serve  
 228 more people.

229

Tab.2 Comparisons of service capacity under different disaster scenarios

| Scenarios       | Response time(min) | Current service area(km <sup>2</sup> ) | Optimal service area(km <sup>2</sup> ) | current service population | optimal service population |
|-----------------|--------------------|----------------------------------------|----------------------------------------|----------------------------|----------------------------|
| no flood        | 0-8                | 236.63                                 | 256.7                                  | 2088905                    | 2174649                    |
|                 | 0-12               | 300.52                                 | 306.8                                  | 2318052                    | 2334324                    |
|                 | 0-15               | 318.59                                 | 314.9                                  | 2368158                    | 2356228                    |
| 1000-year flood | 0-8                | 205.66                                 | 236.44                                 | 1838621                    | 2081456                    |
| in 2050         | 0-12               | 265.97                                 | 279.7                                  | 2186255                    | 2213578                    |
|                 | 0-15               | 282.93                                 | 286.52                                 | 2221628                    | 2228562                    |

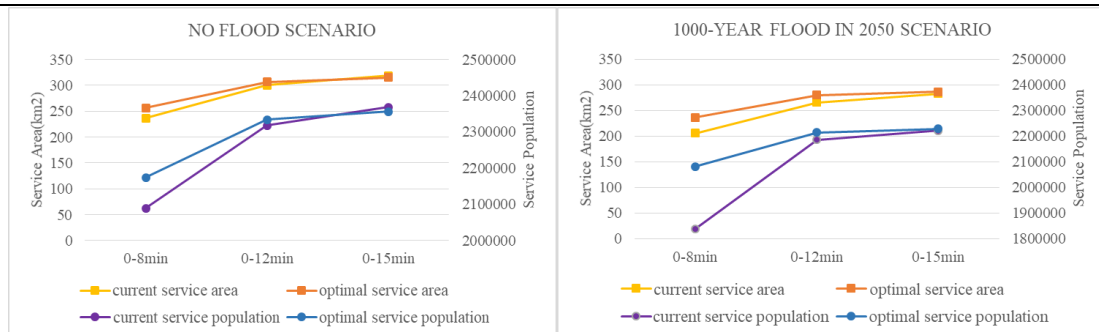

230

231

Fig.5 Service capacity comparison with line chart

232

233 **16. Finally, what about the indirect impact of flooding (indirect vulnerability)?**

234 Apart from causing casualties, flooding may also damage emergency facilities(Figure 2);  
 235 furthermore, flood inundation could damage to buildings and roads will lead to traffic congestion  
 236 and render emergency rescue more difficult than usual, making rescue more difficult than usual and  
 237 delaying the emergency response. The surface water flooding was shown to cause more disruption  
 238 to emergency responders operating within the city due to its widespread and spatially distributed  
 239 footprint when compared to fluvial flood events of comparable magnitude (Green et al., 2017).

240

241

242

243

244

245

246

247 **B. Questions related to the form of the article ("technical corrections")**

248

249 **1 Concerning the two selected flood scenarios (100 and 1000-years), what is the major**  
250 **historical flood that has been observed on the site? It would be interesting to consider the**  
251 **major historical hazard?**

252

253 Thanks for noting this. Our flooding scenarios results took reference by (Yin et al., 2011) research,  
254 and we choose two representative scenarios (100y or 1000y scenario)(Figure 2) to analysis the  
255 emergency response during flooding disasters.

256 As a typical tidal river, the Huangpu River is influenced by tides of the East China Sea with an  
257 average tide range of around 2.3 m at the river estuary. Given the low relief of the Huangpu River  
258 floodplain, it is subject to significant flood hazards from both the coastlines and the Huangpu River  
259 in the event of high tides. Indeed, the study area was frequently inundated by the Huangpu River  
260 until flood walls were erected during the 1950s. These have since been extended and reinforced. As  
261 a result, most of the study site is now protected from coastal and fluvial flooding, albeit again events  
262 with various return periods. Based on flood probability analysis carried out in 1984 by the Shanghai  
263 Water Authority, the design standard for flood walls along the Huangpu River was one in 1,000  
264 years for urban area and one in 50 years in rural areas. However, our study area is rural area, so we  
265 it can be attacked by fluvial flooding more easily. Whatever flooding may destroy this area easily.

266

267 **2 Line 188 : "... the disaster risk level  $m_i/p_j$  of the demand points/potential facilities**

268 Thanks for noting this.

269 [The sentence has been revised as follows:](#)

270 ["the disaster risk level of the demand points\( \$m\_i\$ \) and potential facilities\( \$p\_j\$ \)."](#)

271

272 **3 Line 322: why the alpha and beta weights are the same (equal)?**

273 It's an important question, in line 204 we calculated coverage level by Eq (9)

274 
$$Q_i = INT(\alpha A1_i + \beta A2_i + \dots + \varepsilon An_i + 1)$$

275 Where  $\alpha, \beta \dots \varepsilon$  represent the weights of the different indicators, i.e., their relative contributions to  
276 the estimated demand. The weights can be determined according to the actual situation of the study  
277 area, in case study, we regarded the population and the historical EMS calls for help at each demand  
278 point as the influencing factors  $A_1$  and  $A_2$ . Both factors are important, so we did not quantify the  
279 weights of each factor, set alpha and beta weights the same.

280 [We have added the explanation on this:](#)

281 ["we regarded the population density and the historical EMS calls for help at each demand point as](#)  
282 [the influencing factors  \$A\_1\$  and  \$A\_2\$ , respectively of the demand coverage level \(using Eq. \(9\)\) and](#)  
283 [used equal weights for the two factors as for a specially instance \( \$\alpha = \beta = 0.5 \* 10\$ \)"](#)

284

285 **4 Line 290: "Figure 3 shows the impact on the area serviced by each station for the different**  
286 **flood scenarios.**

287 **Line 298: it is difficult to make visually and easily the link between the coloured curves and**  
288 **the legend (the name of each EMS).**

289 **At least, the order of the name of the stations (12 EMS) in the legend must be the same than**

290 **the order of the curves to improve the reading of this Fig.**  
 291 Thanks for your comments, sorry for the low readability of Figure 3 in paper,  
 292 The Figure 3 in paper has been revised as follows:

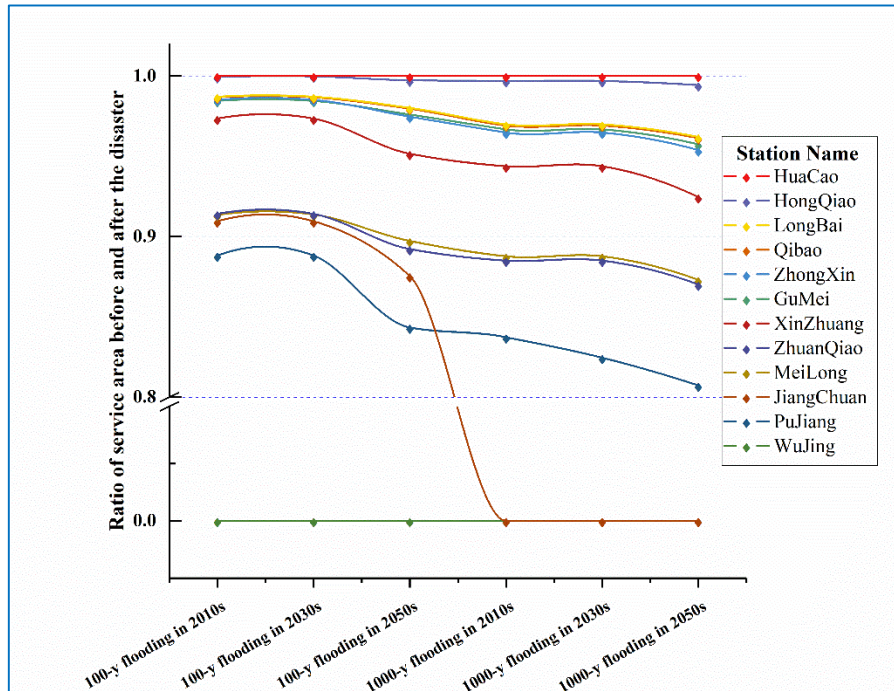

293  
 294

295 **5 Line 411: Fig. 9 Comparisons of the average coverage level**

296 **Figure 9 shows “coverage level” in REAL values (3.54, 3.74 etc.) and not in INTEGER values?**  
 297 **(See equation 9, page 5)**

298 Thanks for noting this. Sorry, we didn’t have a clear distinction between average coverage and  
 299 coverage level.

300 The description and the Figure has been revised as:

301 “We combined the service areas of all emergency stations and used the Spatial Join tool in ArcGIS  
 302 10.2 to calculate how many times every demand point would be covered in 8, 12, and 15 minutes  
 303 during the no-flooding and the worst-case flooding scenarios. To compare precisely, we then  
 304 compared the average values (Figure 11).”

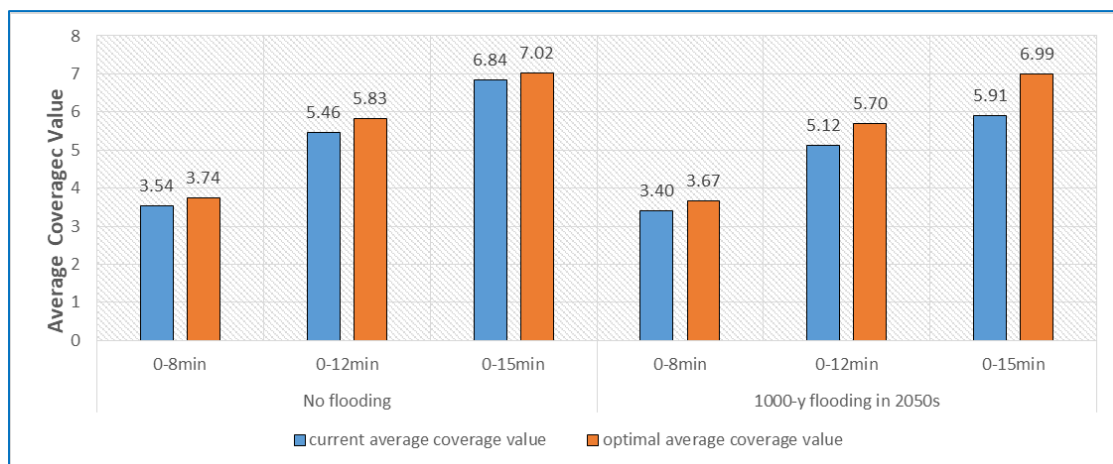

305  
 306

(Fig. 11 Comparisons of the average coverage value)

307 **6 Finally, I propose to the authors (if possible) to design a logi-gram related to the developed**  
 308 **methodology and results. Please, see example of the Figure 2, page 689, Alaeddine et al., 2015.**  
 309 **Thanks for your comments, we added a logi-gram as below:**  
 310

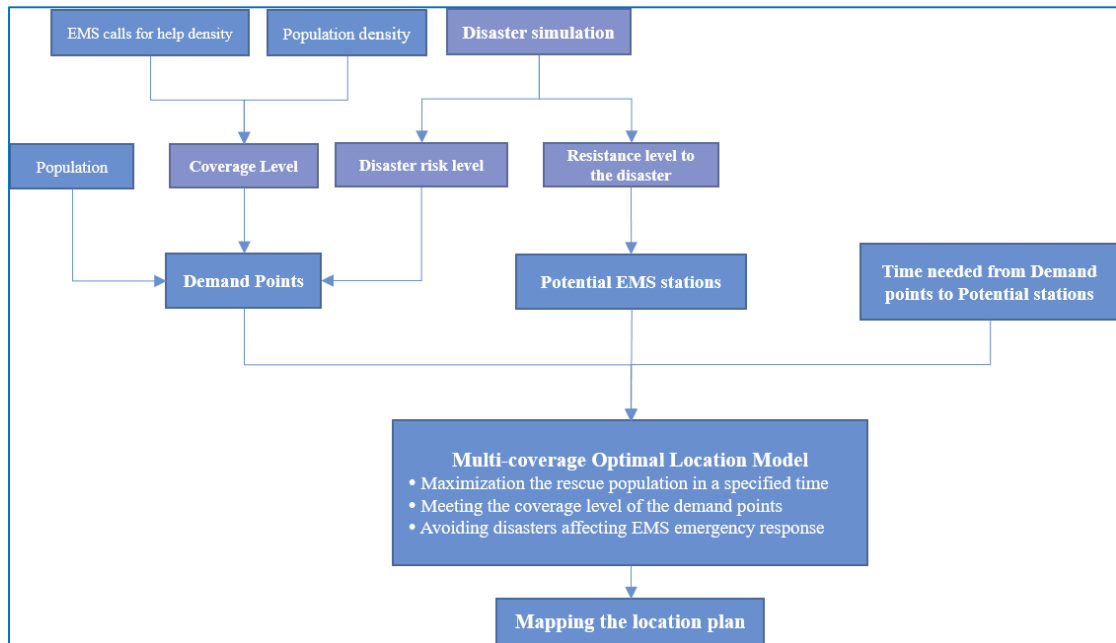

311  
 312  
 313  
 314  
 315  
 316  
 317  
 318  
 319  
 320  
 321

**7 We appreciate all the other technical corrections comments, and changes have been made accordingly.**

322  
 323  
 324  
 325  
 326  
 327  
 328  
 329  
 330  
 331  
 332

**Reference**

Green, D., Yu, D. P., Pattison, I., Wilby, R., Boshier, L., Patel, R., Thompson, P., Trowell, K., Draycon, J., Halse, M., Yang, L. L., and Ryley, T.: City-scale accessibility of emergency responders operating during flood events, Nat Hazard Earth Sys, 17, 1-16, 2017.

Yin, J., Yin, Z. E., Hu, X. M., Xu, S. Y., Wang, J., Li, Z. H., Zhong, H. D., and Gan, F. B.: Multiple scenario analyses forecasting the confounding impacts of sea level rise and tides from storm induced coastal flooding in the city of Shanghai, China, Environ Earth Sci, 63, 407-414, 2011.

Yin, J., Yu, D., Yin, Z., Wang, J., and Xu, S. J. C. C.: Modelling the combined impacts of sea-level rise and land subsidence on storm tides induced flooding of the Huangpu River in Shanghai, China, 119, 919-932, 10.1007/s10584-013-0749-9, 2013.
