# Supplementary material for: Multi-coverage Optimal Location Model for Emergency Medical Services (EMS) facilities under various disaster scenarios: A case study of urban fluvial floods in the Minhang District of Shanghai, China
Source: Copernicus journal article supplement (doi:10.5194/nhess-2019-214), 2019-07-18
Supplement: Supplementary file [file nhess-2019-214-AC2-supplement.pdf]

1 We sincerely thank Reviewer #2 for his/her careful review and constructive feedback  
2 and suggestions. We truly believe that the changes suggested by Referee #2 will  
3 enhance the quality of the manuscript. A point-by-point response is presented below.

- 4  
5 **1. \*Page 1 line 14: I suggest replacing “add valuable minutes to travel times” to “may**  
6 **significantly increase the total travel time”.**

7  
8 Thanks for your suggestion, the sentence has been changed as  
9 “However, disasters increase the difficulty of rescue and may significantly increase the total  
10 travel time between dispatch and arrival.”

- 11  
12 **2. \*Page 1 line 22: Since EMS is defined as “Emergency medical services” in the abstract, I**  
13 **suggest using “Emergency medical services” in the keywords as well instead of just**  
14 **“Emergency medical service”.**

15  
16 Thanks for noting this. The key words has been replaced.

- 17  
18  
19 **3. \*Pages 1: The authors start the introduction section with a discussion regarding the**  
20 **importance of emergency services. I suggest including a broader discussion, highlighting**  
21 **potential consequences of disasters, importance of emergency evacuation and disaster**  
22 **preparedness, and the need for developing the methodologies that can improve both**  
23 **emergency services and emergency evacuation. In the discussion, I recommend**  
24 **acknowledging some relevant studies, including the following:**

25  
26 Thanks for your comments, we have read the relevant papers and one of the included references  
27 were also added to the reference list as below:

28  
29 “The demands being placed upon emergency services often exceed the resources made available  
30 by governments(Liu et al., 2017) . Furthermore, disasters always take more time to respond to  
31 the EMS demands due to a very dense traffic flow along the rescue routes. A crash at the rescue  
32 route may block one or several lanes, which will further result in congestion, significantly delay  
33 the emergencies efficiency, and may ultimately result in casualties (Dulebenets et al., 2019).  
34 Therefore, the maintenance of efficiency and quality of emergency services during disasters is  
35 the key to emergency management.”

- 36  
37 **4. \*Page 3: Towards the end of the introduction section, please briefly discuss the structure**  
38 **of the manuscript (what would be described in the next sections of the manuscript).**

39  
40 Thanks for noting this. We have added discussion about the structure of the manuscript of  
41 introduction section as follows:

42  
43 “In the following sections, we describe the problems that the model needs to solve and the  
44 design of the Optimal Location Model. We also take a case study of urban fluvial floods in the

45 Minhang District of Shanghai, China to validate this model.”

46

47 5. **\*Page 3: It would be good to have a Figure in section 2.1, illustrating the problem of**  
48 **interest. This will help the readers visualizing the problem at hand.**

49 Thanks for your comments, we added one qualitative expression of problems and one logi-gram  
50 to make it clearer as follows:

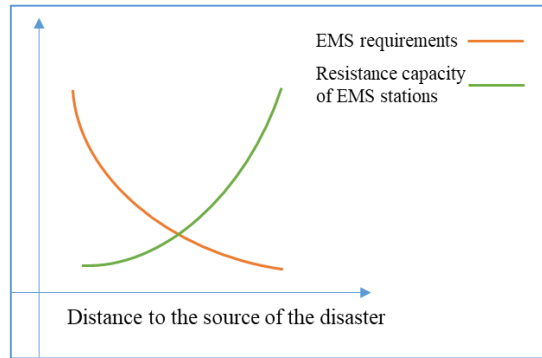

51

52 Fig.1 Description of Model problems

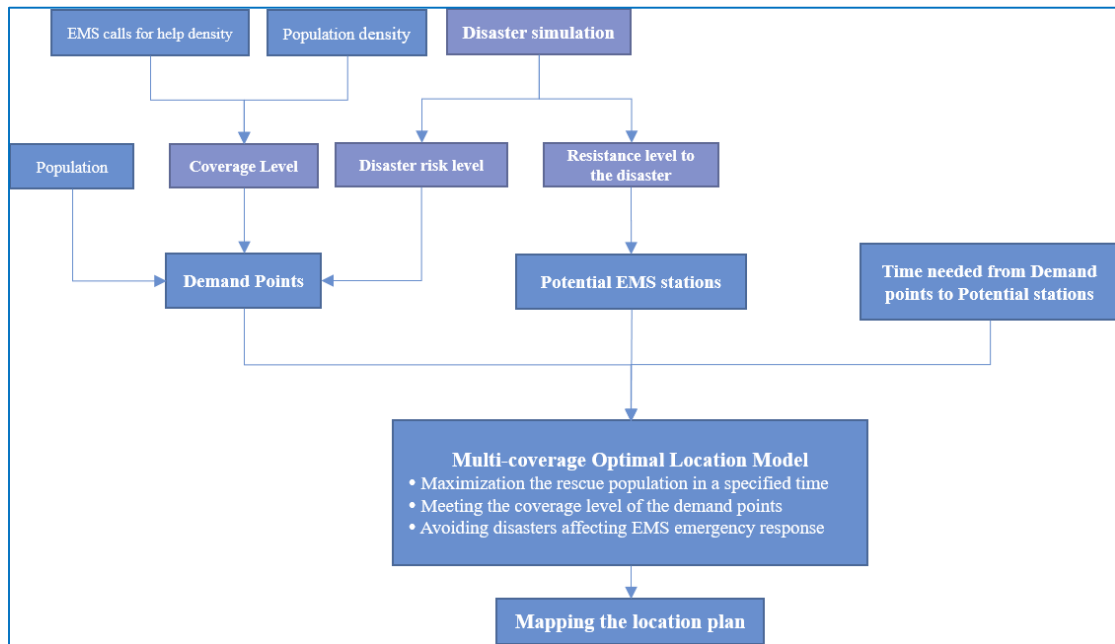

53

54 Fig.2 Multi-coverage Optimal Location selection logi-gram

55

56 6. **Pages 4-5: There are some issues with the control of indexes in the mathematical model.**  
57 **For example, in constraint set (2) you have  $y_j$  but you are summing over  $i$ , which is**  
58 **incorrect. The summation should be over index  $j$ . In constraint set (4) indexes “ $i,j$ ” are not**  
59 **controlled. I assume you are trying to enforce the following condition:  $t_{ij} \leq T \forall i \in I, j$**   
60  **$\in J$ . Again, please check the entire model and make sure that all the issues associated**  
61 **with the control of indexes are fixed.**

62

63 Thanks for noting this. The formulas has been corrected

64

65

66 7. **\*Pages 7-8: Did you develop Figures 1 and 2 yourself? If not, please provide a relevant**  
67 **reference.**

68

69 Yes, Figures 1 and 2 in manuscript were developed by ourselves, Figure 1 was illustrated by  
70 ArcGIS 10.2 software and Figure 2 was simulated by Floodmap model and illustrated by  
71 ArcGIS 10.2.

72

73 8. **\*Page 15: The conclusion section should be strengthened. The authors should clearly**  
74 **highlight limitations of this study and how they will be addressed in future research.**

75

76 Thanks for your suggestion, we have added the limitations of this study and the future research  
77 in conclusion:

78 The model also has some aspects that could to be improved in order to arrive at more robust  
79 solutions. Firstly, in our case study, we did not have a quantitative assessment of the disasters  
80 risk level on emergency response, we evaluated the disaster risk level only by the buffer  
81 distance to disaster source area, which is subjective. Secondly, as we only analyzed in theory,  
82 our model did not consider whether the terrain or other basic conditions were suitable for the  
83 EMS facilities. The future studies will consider disaster risk factors such as the vulnerability  
84 of buildings comprehensively, evaluate the level of disaster risk quantitatively, and take the  
85 real terrain and construction cost of each potential point into full account.

86

87 Lastly, the location of urban emergency service facilities has always been the focus of urban  
88 planning. Location selection should consider a variety of factors and the ability to respond to  
89 disasters is also a key factor to consider, while in this paper, we divided the area into grids with  
90 a cell size of 2 km \* 2 km and assumed that every grid center point was a potential emergency  
91 station, The division of grid will affect the efficiency of model running efficiency and the  
92 accuracy of results. The smaller the scale, the higher the accuracy, but the greater the running  
93 pressure. Therefore, in the future research, we will consider multi-scale division with variable  
94 squared meshes taking into account the distribution density of the population.

95

96

97

98

99 **Reference**

100 Dulebenets, M. A., Abioye, O. F., Ozguven, E. E., Moses, R., Boot, W. R., and Sando, T.:  
101 Development of statistical models for improving efficiency of emergency evacuation in areas  
102 with vulnerable population, Reliability Engineering & System Safety, 182, 233-249,  
103 <https://doi.org/10.1016/j.ress.2018.09.021>, 2019.

104
